# Supplementary material
Source: bioRxiv or medRxiv preprint supplement (https://www.biorxiv.org/highwire/filestream/12245/field_highwire_adjunct_files/0/045054-1.pdf)
Supplement: Supplementary file [file 045054-1.pdf]

## SUPPLEMENTARY DATA

ZIP archive (IntaRNA\_Supp.zip) containing the calculations performed on the web server version of IntaRNA (<http://bit.ly/IntaRNA>) at the temperatures: 10 °C, 25 °C and 45 °C (see Materials and Methods for the other parameters).

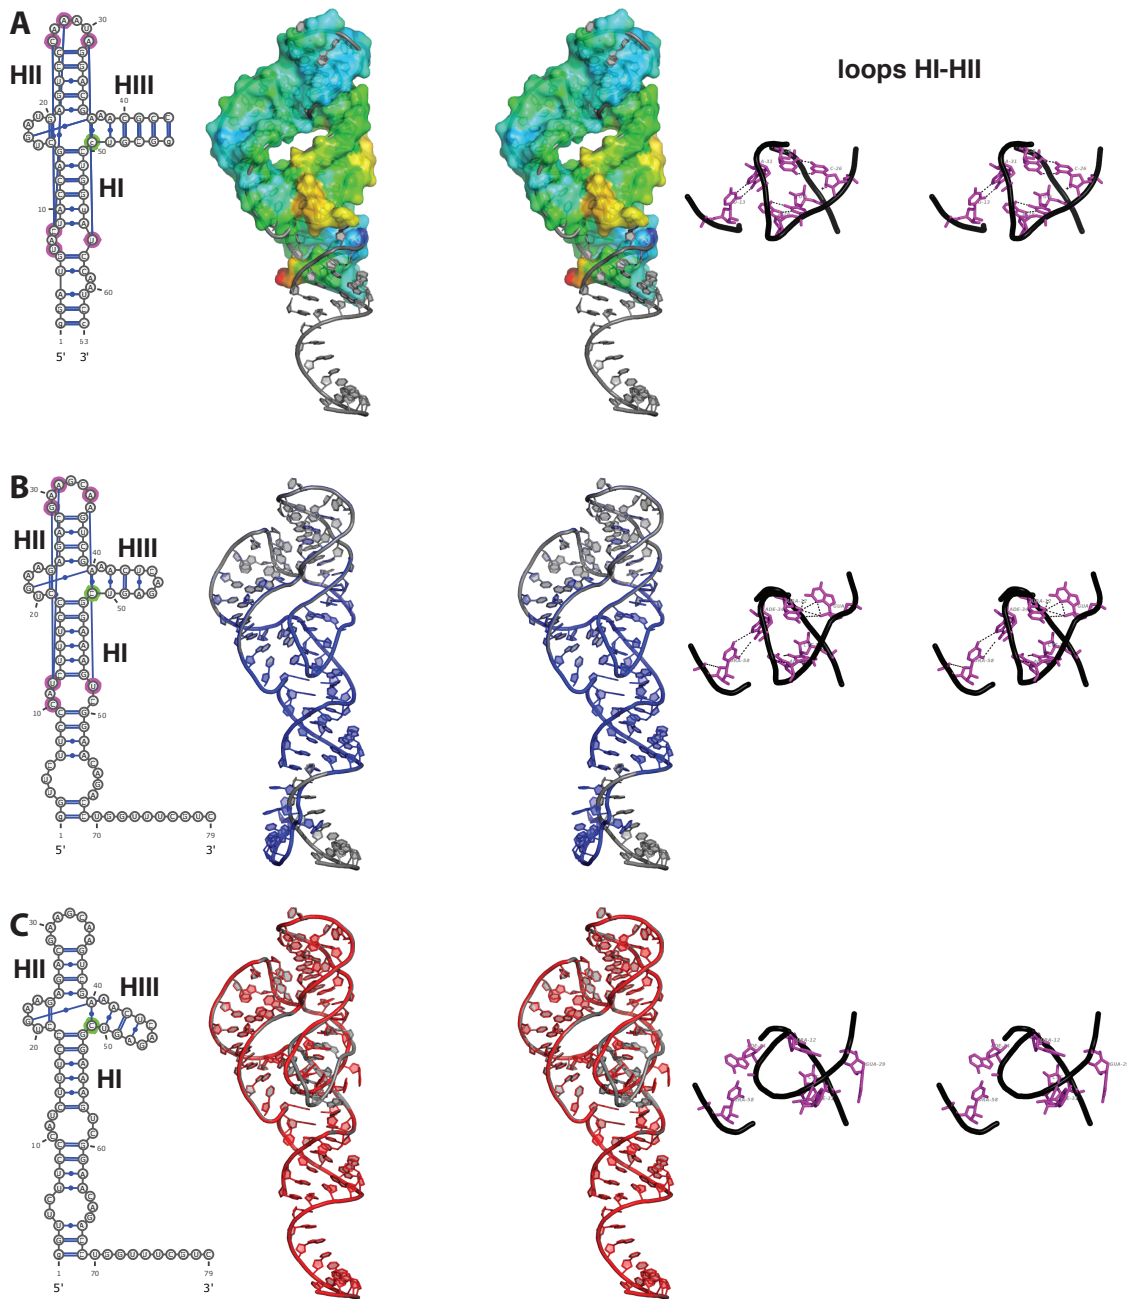

Figure S1: Comparisons of RNA 3D Structures from X-ray crystallography and RNA Modeling. (Legend on the following page).

Figure S1: Comparisons of RNA 3D Structures from X-ray crystallography and RNA Modeling. (A) 2D and 3D structures of the template and modeled ribozymes. Left: 2D structure of the template corresponding to the X-ray 3D structure of a minimal HHR ribozyme (PDB ID: 2OEU). Middle: stereo-view of the superposition between the 3D model of HHR (-) (79-mer) and the X-ray 3D structure of the template (PDB ID: 2OEU). The X-ray structure is represented by a solvent accessible surface using a color code corresponding to the B factors. The 3D model (grey) in cartoon representation shows slight structural differences: the presence of a triloop closing the HIII domain, the presence of bulge nucleotides in the HI domain which is also significantly extended in ASBVd. Right: stereo-view of the intramolecular tertiary contacts between the domains HI and HII in the template (PDB ID: 2OEU). (B) 2D and 3D structures of the folded monomer preserving tertiary contacts. Left: 2D structure with indication of the homologous 3D tertiary contacts. Middle: stereo-view of the superposition between the 3D model of HHR (-) in its unbound (grey)/bound (blue) conformations for the first monomer. Right: stereo-view of the intramolecular tertiary contacts between the domains HI and HII in the folded monomer. (C) 2D and 3D structures of the unfolded monomer in the HIII terminal loop. Left: 2D structure of the unfolded monomer. Middle: stereo-view of the superposition between the 3D model of HHR (-) in its unbound (grey)/bound (red) conformations for the unfolded monomer. Right: stereo-view of the lost intramolecular tertiary contacts between the domains HI and HII in the unfolded monomer.

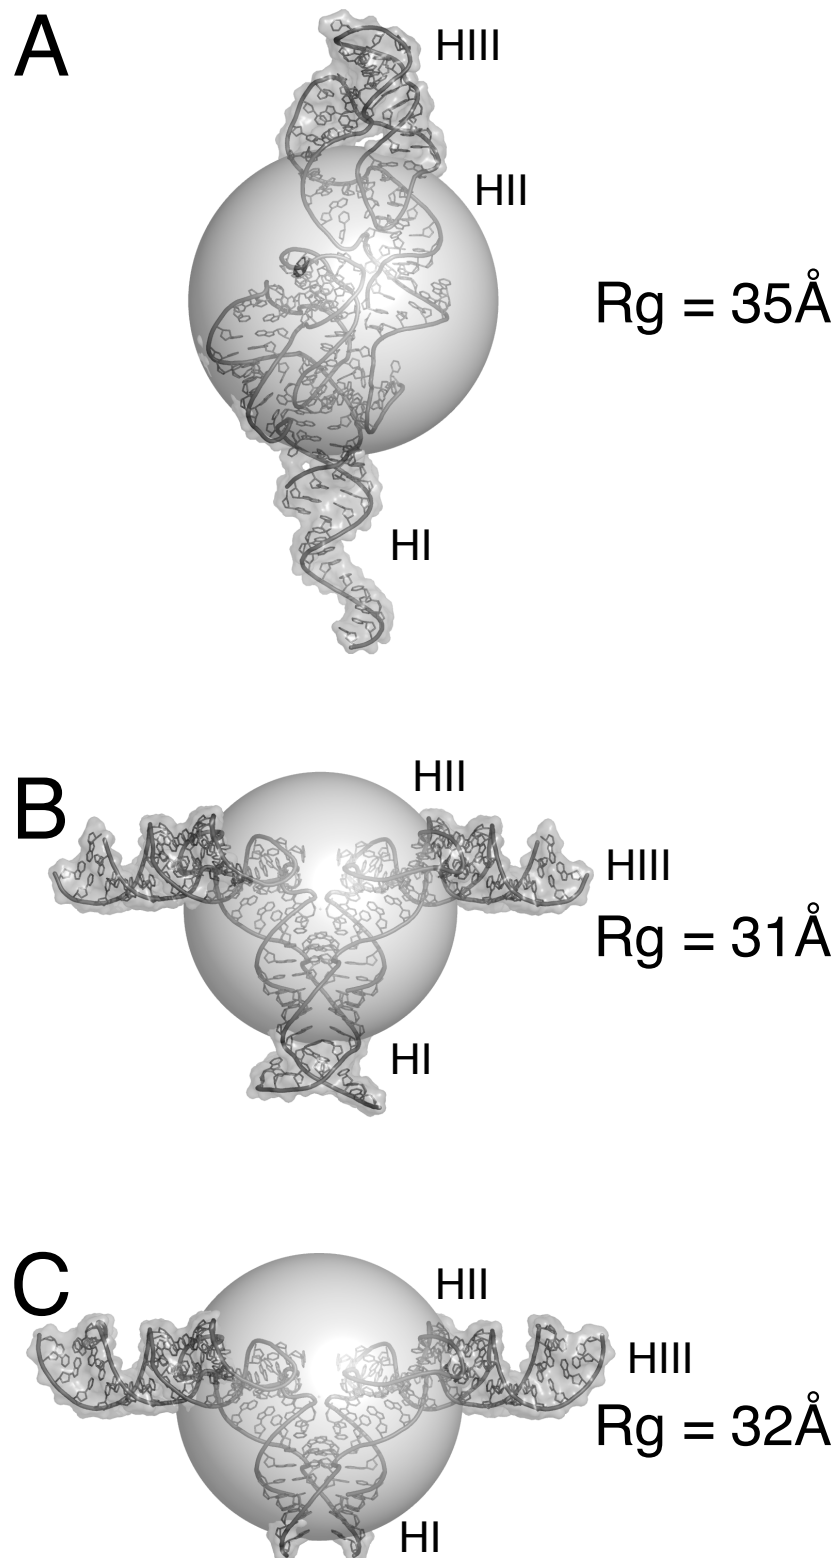

Figure S2: Relationship between the mode of association and the radius of gyration of HHR dimers. (A) 3D model of the HHR (-) dimer from ASBVd (Fig. 5C). (B) 3D structure of an artificial HHR dimer with an extended HI domain (PDB ID: 5DI2, 68 nt + 11 nt). (C) 3D structure of an artificial HHR dimer with an extended HIII domain (PDB ID: 5DI2, 68 nt + 11 nt). The 3D structures were extended by 11 nt in the HI or HIII domains to match the 79 nt length of HHR (-) and optimized using the same minimization protocol (see Methods). Using a scaling factor of 1.4 to account for the dynamics of the HHR RNA (see Results), the corrected radii of gyration are the following: 49Å (A), 43Å (B) and 45Å (C) versus 50Å as calculated from SANS data.
